# Supplementary material
Source: HighWire-hosted journal article supplement (https://bibliotheek.ehb.be/content/75/5/433)
Supplement: inline-supplementary-material-3 [file inline-supplementary-material-3.pdf]

**Table S1.** Example of cohort-specific information collected, harmonization potential, and processing algorithms for the variable ‘Number of estimated pack years of the participant’. Note that harmonization processing accounted for longitudinal cross-checks for consistency among data collection events. For example, if a participant responded “Yes” to “Ever smoked cigarettes” at baseline or preceding data collection events, then they would be considered as “Yes” in later follow-ups.

| DataSchema variable: Number of estimated pack-years of the participant.<br>Format: Continuous (decimal)<br>Unit: pack-years |                                                                                                                                                                                                                        |                                                                                                                 |                         |                                                                                                                                                                                                                                                                                                                                                                                                                               |
|-----------------------------------------------------------------------------------------------------------------------------|------------------------------------------------------------------------------------------------------------------------------------------------------------------------------------------------------------------------|-----------------------------------------------------------------------------------------------------------------|-------------------------|-------------------------------------------------------------------------------------------------------------------------------------------------------------------------------------------------------------------------------------------------------------------------------------------------------------------------------------------------------------------------------------------------------------------------------|
| # datasets                                                                                                                  | Cohort-specific variables                                                                                                                                                                                              | Cohort-specific variable format                                                                                 | Harmonization potential | Processing Algorithm                                                                                                                                                                                                                                                                                                                                                                                                          |
| 3                                                                                                                           | 1. Smoking pack-years                                                                                                                                                                                                  | 1. Continuous                                                                                                   | Complete                | Direct mapping from [Smoking pack years]                                                                                                                                                                                                                                                                                                                                                                                      |
| 1                                                                                                                           | 1. Ever smoked cigarettes<br>2. Avg #cig/day<br>3. Total years smoked cigarettes                                                                                                                                       | 1. Yes   No<br>2. Continuous<br>3. Continuous                                                                   | Complete                | Values are coded to 0 if [Ever smoked cigarettes] = No<br>ELSE<br>([Avg #cig/day]/20)*[Total years smoked cigarettes]                                                                                                                                                                                                                                                                                                         |
| 1                                                                                                                           | 1. Ever smoked cigarettes<br>2. Pack-years                                                                                                                                                                             | 1. Yes   No<br>2. Continuous                                                                                    | Complete                | Values are coded to 0 if [Ever smoked cigarettes] = No<br>ELSE<br>Direct mapping from [pack years]                                                                                                                                                                                                                                                                                                                            |
| 1                                                                                                                           | 1. Ever smoked cigarettes<br>2. Cigarettes-year, former smoker<br>3. Cigarettes-year, current smoker                                                                                                                   | 1. Yes   No<br>2. Continuous<br>3. Continuous                                                                   | Complete                | Values are coded to 0 if [Ever smoked cigarettes] = No<br>ELSE<br>If [Cigarettes-year, former smoker] = Missing<br>• [Cigarettes-year, current smoker]/(20*365)<br>ELSE<br>If [Cigarettes-year, former smoker] ≠ Missing<br>• [Cigarettes-year, former smoker]/(20*365)                                                                                                                                                       |
| 1                                                                                                                           | 1. Age of participant<br>2. Current cigarette smoker<br>3. Past cigarette smoker<br>4. Cigarette smoking start age<br>5. Cigarette smoking stop age<br>6. Avg # cig/day past smoker<br>7. Avg # cig/day current smoker | 1. Continuous<br>2. Yes   No<br>3. Yes   No<br>4. Continuous<br>5. Continuous<br>6. Continuous<br>7. Continuous | Complete                | Values are coded to 0 if [Current cigarette smoker] = No & [Past cigarette smoker] = No<br>ELSE<br>If [Current cigarette smoker] = No & [Past cigarette smoker] = Yes<br>• ([Cigarette smoking stop age] – [Cigarette smoking start age]) * ([Avg # cig/day past smoker]/20)<br>ELSE<br>If [Current cigarette smoker] = Yes<br>• ([Age of participant] – [Cigarette smoking start age]) * ([Avg # cig/day current smoker]/20) |
| 2                                                                                                                           | 1. Qty cig smoked, when daily<br>2. Total yrs daily smoker                                                                                                                                                             | 1. Categorical<br>2. Continuous                                                                                 | Impossible              | N/A                                                                                                                                                                                                                                                                                                                                                                                                                           |
| 1                                                                                                                           | Information not available                                                                                                                                                                                              | N/A                                                                                                             | Impossible              | N/A                                                                                                                                                                                                                                                                                                                                                                                                                           |
